# Supplementary material for: Data-driven evolution of neurosurgical gene therapy delivery in Parkinson’s disease
Source: PubMed Central journal article supplement — J Neurol Neurosurg Psychiatry. 2020 Jul 30;91(11):1210–8. doi: 10.1136/jnnp-2020-322904 (PMC7569395; doi:10.1136/jnnp-2020-322904), 2020-07-30
Supplement: jnnp-2020-322904supp001.pdf [file jnnp-2020-322904supp001.pdf]

## SUPPLEMENTARY MATERIAL

Supplementary Table 1. Clinical outcomes and infusion parameters in published trials of gene therapy in Parkinson's disease

| Vector         | Therapeutic rationale                                                                        | Trial phase, N                        | Dates of inclusion                             | Target            | Anesthesia                       | Cannula design                                 | Delivery parameters (per hemisphere)            | Maximum vector dose                 | Volume per target      | Infusion rate                   | Clinical outcome                                                                                  | References |
|----------------|----------------------------------------------------------------------------------------------|---------------------------------------|------------------------------------------------|-------------------|----------------------------------|------------------------------------------------|-------------------------------------------------|-------------------------------------|------------------------|---------------------------------|---------------------------------------------------------------------------------------------------|------------|
| AAV2-GAD       | Correct pathological overactivity in STN by synthesis of GABA                                | Phase 1, N=12                         | August 2003–August 2005 (clinicaltrials.gov)   | STN unilateral    | Awake MAC (MER)                  | Rigid glass                                    | Single tract, single point fusion, CED infusion | $5 \times 10^{10}$ vg               | 50 $\mu$ L             | 0.5 $\mu$ L/min                 | Improved UPDRS motor scores (on and off medication) at 12 months                                  | 17         |
|                |                                                                                              | Phase 2, N=45 (n=22 active treatment) | August 2008–December 2010 (clinicaltrials.gov) | STN bilateral     | Awake MAC (MER)                  | Flexible                                       | Single tract, single point fusion, CED infusion | $3.45 \times 10^{10}$ vg per STN    | 34.5 $\mu$ L per STN   | 0.23 $\mu$ L/min                | Improved UPDRS motor scores off medication vs sham surgery at 6 and 12 months                     | 18,19      |
| AAV2-neurturin | Promote survival of dopaminergic neurons through expression of neurotrophic factor neurturin | Phase 1, N=12                         | May 2005–March 2007                            | Putamen bilateral | Sedation                         | Guide tube with step to smaller cannula, rigid | 4 tracts, 2 points per tract, hand injection    | $2.7 \times 10^{11}$ vg per putamen | 40 $\mu$ L per putamen | (no rate given; hand injection) | Improved UPDRS motor scores off medication vs baseline; no significant change on medication       | 27         |
|                |                                                                                              | Phase 2, N=58 (n=38 active treatment) | December 2006–November 2008                    | Putamen bilateral | Deep sedation/general anesthesia | Guide tube with step to smaller cannula, rigid | 4 tracts, 2 points per tract, hand injection    | $2.7 \times 10^{11}$ vg per putamen | 40 $\mu$ L per putamen | 2 $\mu$ L/min                   | No significant change in UPDRS motor scores (on- and off-medication) vs sham surgery at 12 months | 26         |

|                          |                                                                                           |                                        |                                                                                                        |                                        |                                  |                                                |                                                                                                                                          |                                                                               |                                                          |                                                       |                                                                                                                                                            |       |
|--------------------------|-------------------------------------------------------------------------------------------|----------------------------------------|--------------------------------------------------------------------------------------------------------|----------------------------------------|----------------------------------|------------------------------------------------|------------------------------------------------------------------------------------------------------------------------------------------|-------------------------------------------------------------------------------|----------------------------------------------------------|-------------------------------------------------------|------------------------------------------------------------------------------------------------------------------------------------------------------------|-------|
|                          |                                                                                           | Phase 1b, N=6                          | September 2009–March 2018 (estimated completion as per clinicaltrials.gov – same NCT# for both trials) | Putamen and substantia nigra bilateral | Deep sedation/general anesthesia | Guide tube with step to smaller cannula, rigid | Putamen: 3 tracts, single point per tract; SNc: 1 tract, 2 points per tract; CED infusion                                                | $1 \times 10^{12}$ vg per putamen; $2 \times 10^{11}$ vg per substantia nigra | 150 $\mu$ L per putamen; 30 $\mu$ L per substantia nigra | Putamen 3 $\mu$ L/min; substantia nigra 2 $\mu$ L/min | Trial focused on safety; small decreases in UPDRS motor scores off medication but minimal statistical analysis                                             | 30    |
|                          |                                                                                           | Phase 2b, N=51 (n=24 active treatment) |                                                                                                        | Putamen and substantia nigra bilateral | General anesthesia               | Guide tube with step to smaller cannula, rigid | Putamen – 3 tracts, single point per tract; SNc: 1 tract, 2 points per tract; CED infusion                                               | $1 \times 10^{12}$ vg per putamen; $2 \times 10^{11}$ vg per substantia nigra | 150 $\mu$ L per putamen; 30 $\mu$ L per substantia nigra | Putamen 3 $\mu$ L/min; substantia nigra 2 $\mu$ L/min | No significant difference vs sham surgery in UPDRS motor score (off medication) at minimum 15-month follow-up                                              | 31    |
| Lentiviral TH, AADC, CH1 | Expression of rate-limiting enzymes for local dopamine synthesis from tyrosine in putamen | Phase 1/2, N=15                        | January 2008–August 2011                                                                               | Putamen, bilateral                     | General anesthesia               | Rigid stainless steel                          | All putamen; cohort 1: 4 tracts, multiple points/tract; cohort 2a: 5 tracts, multiple points/tract; cohort 2b/3: 3 tracts, 1 point/tract | $5 \times 10^7$ transducing units per putamen                                 | Not stated                                               | 1–3 $\mu$ L/min                                       | Significant improvement in UPDRS motor scores off medication at 6 and 12 months, but no dose-dependent effect between cohorts with different dosing levels | 23,24 |
| AAV2-hAADC               | Expression of AADC in putamen to provide local dopamine synthesis from precursor levodopa | Phase 1, N=10                          | November 2004–March 2013                                                                               | Putamen, bilateral                     | Sedation                         | Step design, rigid                             | 2 tracts, single point/tract, CED infusion                                                                                               | $1.5 \times 10^{11}$ vg per putamen                                           | 100 $\mu$ L per putamen                                  | 1 $\mu$ L/min                                         | Improved UPDRS motor scores off medication (but not on medication) at 6 months                                                                             | 20,21 |
|                          |                                                                                           | Phase 1, N=6                           | Unknown (not listed in article and                                                                     | Putamen, bilateral                     | Unknown                          | Step design, rigid                             | 2 tracts, single                                                                                                                         | $1.5 \times 10^{11}$ vg per putamen                                           | 100 $\mu$ L per putamen                                  | 1 $\mu$ L/min                                         | Improved UPDRS motor scores off                                                                                                                            | 22    |

|           |                                                                                         |                               |                                                                  |                    |                    |                                |                                                                                               |                                     |                                |            |                                                                                           |    |
|-----------|-----------------------------------------------------------------------------------------|-------------------------------|------------------------------------------------------------------|--------------------|--------------------|--------------------------------|-----------------------------------------------------------------------------------------------|-------------------------------------|--------------------------------|------------|-------------------------------------------------------------------------------------------|----|
|           |                                                                                         |                               | not listed in clinicaltrials.gov; Japanese trial)                |                    |                    |                                | point/tract, CED infusion                                                                     |                                     |                                |            | medication (but not on medication) at 6 months                                            |    |
| VY-AADC01 |                                                                                         | Phase 1 (PD-1101), N=15       | October 2013– (ongoing)                                          | Putamen, bilateral | General anesthesia | Step design, rigid (SmartFlow) | ≥2 tracts, single or multiple points/tract, or progressive advancement with iMRI CED infusion | 2.3×10 <sup>12</sup> vg per putamen | ≤450 μL or ≤900 μL per putamen | ≤30 μL/min | Dose-dependent improvements in UPDRS motor scores (on and off medication) up to 36 months | 46 |
|           |                                                                                         | Phase 1 (PD-1102), N=8        | May 2017– (ongoing)                                              | Putamen, bilateral | General anesthesia | Step design, rigid (SmartFlow) | Single tract, continuous iMRI CED infusion with progressive advancement                       | 4.7×10 <sup>12</sup> vg per putamen | ≤1800 μL per putamen           | ≤30 μL/min | Outcomes data not yet available                                                           | 54 |
| AAV2-GDNF | Promote survival of dopaminergic neurons through expression of neurotrophic factor GDNF | Phase 1, N=13 (early closure) | May, 2012– (ongoing; enrollment halted but follow-up continuing) | Putamen, bilateral | General anesthesia | Step design, rigid (SmartFlow) | 2 trajectories, single point iMRI CED infusion                                                | 9×10 <sup>11</sup> vg per putamen   | 450 μL per putamen             | 1–5 μL/min | No changes in UPDRS motor scores                                                          | 45 |

AADC, L-amino acid decarboxylase; AAV2, AAV serotype 2; CED, convection-enhanced delivery; CH1, cyclohydrolase 1; GABA,  $\gamma$ -aminobutyric acid; GAD, glutamic acid decarboxylase; GDNF, glial cell line-derived neurotrophic factor; hAADC, human AADC; iMRI, intraoperative magnetic resonance imaging; MAC, monitored anesthesia care; MER, microelectrode recording; SNc, substantia nigra pars compacta; STN, subthalamic nucleus; TH, tyrosine hydroxylase; UPDRS, Unified Parkinson's Disease Rating Scale; vg, vector genome.
